# Supplementary material
Source: MDPI journal article supplement (https://www.mdpi.com/2076-3417/11/19/8812)
Supplement: s1 [file s1]

## Supplementary Materials

**Table S1.** Comparison of precision between SPPMI-based keyword expansion and five other base-line models on extracting never smoker-related keywords (Word co-occurrence, PMI vector, NPMI vector, PMI score, and NPMI score models). The values of  $d$  represent a number of singular values used in SVD.

| # of keywords<br>Methods     | Top 1         | Top 5         | Top 10        | Top 20        |
|------------------------------|---------------|---------------|---------------|---------------|
| Word co-occurrence           | <b>36.36%</b> | 14.55%        | 8.18%         | 6.82%         |
| PMI vector                   | 27.27%        | 9.09%         | 5.45%         | 4.09%         |
| NPMI vector                  | 27.27%        | 10.91%        | 9.09%         | 5.00%         |
| PMI score                    | 18.18%        | <b>16.36%</b> | <b>13.64%</b> | <b>11.36%</b> |
| NPMI score                   | 18.18%        | 12.73%        | 12.73%        | <b>11.36%</b> |
| SPPMI (k = 1)                | 27.27%        | 9.09%         | 5.45%         | 4.09%         |
| SPPMI (k = 5)                | <b>36.36%</b> | <b>16.36%</b> | 9.09%         | 5.91%         |
| SPPMI (k = 15)               | <b>36.36%</b> | 14.55%        | 8.18%         | 6.82%         |
| SPPMI-SVD (k = 1, d = 100)   | 18.18%        | 3.64%         | 5.45%         | 3.64%         |
| SPPMI-SVD (k = 1, d = 500)   | 27.27%        | 12.73%        | 7.27%         | 4.09%         |
| SPPMI SVD (k = 1, d = 1000)  | <b>36.36%</b> | 9.09%         | 6.36%         | 3.18%         |
| SPPMI-SVD (k = 5, d = 100)   | 18.18%        | 10.91%        | 5.45%         | 3.64%         |
| SPPMI-SVD (k = 5, d = 500)   | <b>36.36%</b> | 12.73%        | 6.36%         | 3.64%         |
| SPPMI- SVD (k = 5, d = 1000) | <b>36.36%</b> | 12.73%        | 6.36%         | 3.18%         |
| SPPMI SVD (k = 15, d = 100)  | 18.18%        | 12.73%        | 6.36%         | 4.55%         |
| SPPMI- SVD (k = 15, d = 500) | 27.27%        | 12.73%        | 7.27%         | 3.64%         |
| SPPMI-SVD (k = 15, d = 1000) | <b>36.36%</b> | 12.73%        | 7.27%         | 3.64%         |

**Table S2.** Comparison of precision between SPPMI-based keyword expansion and five other base-line models on extracting past smoker-related keywords (Word co-occurrence, PMI vector, NPMI vector, PMI score, and NPMI score models). The values of  $d$  represent a number of singular values used in SVD.

| <b># of keywords</b><br><b>Methods</b> | <b>Top 1</b>  | <b>Top 5</b>  | <b>Top 10</b> | <b>Top 20</b> |
|----------------------------------------|---------------|---------------|---------------|---------------|
| Word co-occurrence                     | 31.25%        | 42.50%        | 35.63%        | <b>35.94%</b> |
| PMI vector                             | 37.50%        | 41.25%        | 33.13%        | 31.25%        |
| NPMI vector                            | 37.50%        | 38.75%        | 32.50%        | 30.00%        |
| PMI score                              | 37.50%        | 38.75%        | 36.88%        | 35.63%        |
| NPMI score                             | 25.00%        | 42.50%        | 37.50%        | 33.75%        |
| SPPMI (k = 1)                          | 37.50%        | 41.25%        | 33.13%        | 31.25%        |
| SPPMI (k = 5)                          | 25.00%        | 32.50%        | 33.13%        | 30.63%        |
| SPPMI (k = 15)                         | 37.50%        | 33.75%        | 28.75%        | 28.44%        |
| SPPMI-SVD (k = 1, d = 100)             | 56.25%        | 43.75%        | <b>41.25%</b> | 35.00%        |
| SPPMI-SVD (k = 1, d = 500)             | 37.50%        | <b>47.50%</b> | 38.13%        | 35.31%        |
| SPPMI SVD (k = 1, d = 1000)            | 43.75%        | 45.00%        | 33.13%        | 30.94%        |
| SPPMI-SVD (k = 5, d = 100)             | <b>68.75%</b> | 35.00%        | 29.38%        | 27.19%        |
| SPPMI-SVD (k = 5, d = 500)             | 25.00%        | 33.75%        | 31.25%        | 31.56%        |
| SPPMI- SVD (k = 5, d = 1000)           | 25.00%        | 36.25%        | 35.63%        | 32.81%        |
| SPPMI SVD (k = 15, d = 100)            | 62.50%        | 40.00%        | 30.00%        | 27.81%        |
| SPPMI- SVD (k = 15, d = 500)           | 56.25%        | 36.25%        | 28.75%        | 28.13%        |
| SPPMI-SVD (k = 15, d = 1000)           | 43.75%        | 32.50%        | 29.38%        | 29.06%        |

**Table S3.** Comparison of precision between SPPMI-based keyword expansion and five other baseline models on extracting current smoker-related keywords (Word co-occurrence, PMI vector, NPMI vector, PMI score, and NPMI score models). The values of  $d$  represent a number of singular values used in SVD.

| # of keywords<br>Methods     | Top 1         | Top 5         | Top 10        | Top 20        |
|------------------------------|---------------|---------------|---------------|---------------|
| Word co-occurrence           | 43.48%        | 40.87%        | 37.39%        | 35.87%        |
| PMI vector                   | 52.17%        | 46.09%        | 42.17%        | 35.87%        |
| NPMI vector                  | 47.83%        | 45.22%        | 42.61%        | 36.96%        |
| PMI score                    | 47.83%        | 45.22%        | 48.26%        | 44.78%        |
| NPMI score                   | 52.17%        | 47.83%        | 49.13%        | <b>45.43%</b> |
| SPPMI (k = 1)                | 52.17%        | 46.09%        | 42.17%        | 35.87%        |
| SPPMI (k = 5)                | 47.83%        | 45.22%        | 41.74%        | 35.43%        |
| SPPMI (k = 15)               | 34.78%        | 35.65%        | 34.78%        | 36.09%        |
| SPPMI-SVD (k = 1, d = 100)   | 52.17%        | <b>56.52%</b> | <b>52.17%</b> | 42.39%        |
| SPPMI-SVD (k = 1, d = 500)   | 60.87%        | 50.43%        | 46.96%        | 38.26%        |
| SPPMI SVD (k = 1, d = 1000)  | 60.87%        | 48.70%        | 41.74%        | 41.09%        |
| SPPMI-SVD (k = 5, d = 100)   | 65.22%        | 52.17%        | 46.52%        | 43.04%        |
| SPPMI-SVD (k = 5, d = 500)   | 56.52%        | 48.70%        | 46.52%        | 41.52%        |
| SPPMI- SVD (k = 5, d = 1000) | 56.52%        | 43.48%        | 43.48%        | 41.09%        |
| SPPMI SVD (k = 15, d = 100)  | <b>69.57%</b> | 53.91%        | 48.70%        | 45.00%        |
| SPPMI- SVD (k = 15, d = 500) | 43.48%        | 39.13%        | 41.30%        | 42.39%        |
| SPPMI-SVD (k = 15, d = 1000) | 47.83%        | 43.48%        | 43.48%        | 40.00%        |

**Table S4.** Comparison of never smoker classification accuracy. All accuracies are reported in F1 scores.

| # of extracted keyword<br>Methods |        |        |        |               |
|-----------------------------------|--------|--------|--------|---------------|
|                                   | 1      | 5      | 10     | 20            |
| Bag of Words                      | 91.57% |        |        |               |
| SPPMI (k = 1)                     | 92.37% | 91.63% | 91.86% | 92.37%        |
| SPPMI (k = 5)                     | 91.33% | 90.61% | 91.29% | 92.21%        |
| SPPMI (k = 15)                    | 91.14% | 90.61% | 91.51% | 91.89%        |
| SPPMI-SVD (k = 1, d = 100)        | 92.47% | 91.10% | 92.08% | 90.64%        |
| SPPMI-SVD (k = 1, d = 500)        | 91.37% | 90.87% | 91.29% | 92.60%        |
| SPPMI SVD (k = 1, d = 1000)       | 91.14% | 91.40% | 92.63% | <b>93.25%</b> |
| SPPMI-SVD (k = 5, d = 100)        | 91.33% | 91.48% | 91.82% | 91.63%        |
| SPPMI-SVD (k = 5, d = 500)        | 91.14% | 91.63% | 92.05% | 91.82%        |
| SPPMI- SVD (k = 5, d = 1000)      | 91.56% | 91.56% | 92.50% | 91.21%        |
| SPPMI SVD (k = 15, d = 100)       | 90.95% | 91.79% | 91.29% | 92.80%        |
| SPPMI- SVD (k = 15, d = 500)      | 90.95% | 91.60% | 91.82% | 90.83%        |
| SPPMI-SVD (k = 15, d = 1000)      | 91.60% | 90.99% | 91.40% | 91.79%        |

**Table S5.** Comparison of past smoker classification accuracy. All accuracies are reported in F1 scores.

| # of extracted keyword<br>Methods |        |        |        |               |
|-----------------------------------|--------|--------|--------|---------------|
|                                   | 1      | 5      | 10     | 20            |
| Bag of Words                      | 89.74% |        |        |               |
| SPPMI (k = 1)                     | 87.92% | 87.66% | 88.72% | 88.66%        |
| SPPMI (k = 5)                     | 88.72% | 86.01% | 89.46% | 90.13%        |
| SPPMI (k = 15)                    | 88.66% | 88.43% | 87.14% | 88.48%        |
| SPPMI-SVD (k = 1, d = 100)        | 88.14% | 86.67% | 86.53% | 89.12%        |
| SPPMI-SVD (k = 1, d = 500)        | 89.06% | 87.96% | 88.14% | 90.21%        |
| SPPMI SVD (k = 1, d = 1000)       | 88.02% | 89.46% | 90.54% | <b>90.72%</b> |
| SPPMI-SVD (k = 5, d = 100)        | 88.60% | 89.06% | 86.38% | 89.29%        |
| SPPMI-SVD (k = 5, d = 500)        | 88.48% | 89.00% | 88.49% | 90.18%        |
| SPPMI- SVD (k = 5, d = 1000)      | 88.37% | 88.61% | 90.08% | 90.31%        |
| SPPMI SVD (k = 15, d = 100)       | 88.89% | 87.34% | 86.45% | 88.44%        |
| SPPMI- SVD (k = 15, d = 500)      | 87.66% | 87.40% | 88.83% | 88.89%        |
| SPPMI-SVD (k = 15, d = 1000)      | 88.54% | 88.49% | 88.49% | 89.17%        |

**Table S6.** Comparison of current smoker classification accuracy. All accuracies are reported in F1 scores.

| # of extracted keyword<br>Methods |        |        |        |               |
|-----------------------------------|--------|--------|--------|---------------|
|                                   | 1      | 5      | 10     | 20            |
| Bag of Words                      | 77.88% |        |        |               |
| SPPMI (k = 1)                     | 80.18% | 81.19% | 82.52% | 80.95%        |
| SPPMI (k = 5)                     | 84.91% | 78.64% | 84.21% | 84.62%        |
| SPPMI (k = 15)                    | 82.19% | 83.96% | 83.18% | 84.51%        |
| SPPMI-SVD (k = 1, d = 100)        | 80.37% | 80.58% | 80.75% | 83.02%        |
| SPPMI-SVD (k = 1, d = 500)        | 82.88% | 84.11% | 82.86% | 84.36%        |
| SPPMI SVD (k = 1, d = 1000)       | 82.19% | 83.57% | 84.91% | <b>86.92%</b> |
| SPPMI-SVD (k = 5, d = 100)        | 81.45% | 84.51% | 79.43% | 82.52%        |
| SPPMI-SVD (k = 5, d = 500)        | 82.51% | 82.46% | 83.41% | 84.47%        |
| SPPMI- SVD (k = 5, d = 1000)      | 81.65% | 82.46% | 85.02% | 83.25%        |
| SPPMI SVD (k = 15, d = 100)       | 83.57% | 81.13% | 80.58% | 83.33%        |
| SPPMI- SVD (k = 15, d = 500)      | 81.25% | 81.90% | 82.30% | 81.55%        |
| SPPMI-SVD (k = 15, d = 1000)      | 82.73% | 82.76% | 83.81% | 81.73%        |

**Table S7.** Comparison of unknown smoking status classification accuracy. All accuracies are reported in F1 scores.

| <del># of extracted<br/>keyword<br/>Methods</del> | <b>1</b> | <b>5</b> | <b>10</b> | <b>20</b>     |
|---------------------------------------------------|----------|----------|-----------|---------------|
| Bag of Words                                      | 93.05%   |          |           |               |
| SPPMI (k = 1)                                     | 93.81%   | 94.68%   | 94.45%    | 94.61%        |
| SPPMI (k = 5)                                     | 93.96%   | 94.31%   | 94.54%    | 94.31%        |
| SPPMI (k = 15)                                    | 93.66%   | 94.79%   | 94.55%    | 94.32%        |
| SPPMI-SVD (k = 1, d = 100)                        | 94.13%   | 94.18%   | 94.18%    | 94.42%        |
| SPPMI-SVD (k = 1, d = 500)                        | 93.66%   | 94.06%   | 94.54%    | 94.35%        |
| SPPMI SVD (k = 1, d = 1000)                       | 93.45%   | 93.68%   | 94.55%    | <b>95.06%</b> |
| SPPMI-SVD (k = 5, d = 100)                        | 93.55%   | 94.31%   | 94.45%    | 94.57%        |
| SPPMI-SVD (k = 5, d = 500)                        | 93.43%   | 94.54%   | 94.54%    | 94.54%        |
| SPPMI- SVD (k = 5, d = 1000)                      | 93.43%   | 93.80%   | 94.29%    | 94.42%        |
| SPPMI SVD (k = 15, d = 100)                       | 94.20%   | 93.84%   | 94.18%    | 94.83%        |
| SPPMI- SVD (k = 15, d = 500)                      | 93.55%   | 93.71%   | 94.54%    | 94.78%        |
| SPPMI-SVD (k = 15, d = 1000)                      | 93.55%   | 93.74%   | 94.55%    | 94.54%        |
